# Supplementary material for: High structural stability and Li-conduction of LiNi0.8Co0.1Mn0.1O2 cathode co-coated by Al2O3 and LiNbO3 for high performance lithium-ion battery
Source: Royal Society of Chemistry journal article supplement (doi:10.1039/d4ta04206a), 2024-01-01
Supplement: d4ta04206a1.pdf [file d4ta04206a1.pdf]

## Supplementary information

### **High structural stability and Li-conduction of $\text{LiNi}_{0.8}\text{Co}_{0.1}\text{Mn}_{0.1}\text{O}_2$ cathode coated by $\text{Al}_2\text{O}_3$ and $\text{LiNbO}_3$ for high performance lithium-ion battery**

Chi Nguyen Thi Linh<sup>a</sup>®, Vu Dong Thuc<sup>a</sup>®, Duc Dung Mai<sup>b</sup>, Minh Chien Nguyen<sup>c</sup>, Mong Anh Le<sup>a</sup>, Duy Tho Pham<sup>d</sup>, Woo Jong Yu<sup>c</sup>, Dukjoon Kim<sup>a\*</sup>

*<sup>a</sup>School of Chemical Engineering, Sungkyunkwan University, 2066 Seobu-ro, Jangan-gu, Suwon, Gyeonggi 16419, Republic of Korea*

*<sup>b</sup>Department of Energy Science, Sungkyunkwan University, 2066 Seobu-ro, Jangan-gu, Suwon, Gyeonggi 16419, Republic of Korea*

*<sup>c</sup>Department of Electrical and Computer Engineering, Sungkyunkwan University, 2066 Seobu-ro, Jangan-gu, Suwon, Gyeonggi 16419, Republic of Korea*

*<sup>d</sup>Center for 2D Quantum Heterostructures, Sungkyunkwan University, 2066 Seobu-ro, Jangan-gu, Suwon, Gyeonggi 16419, Republic of Korea*

*\*Corresponding author: [djkim@skku.edu](mailto:djkim@skku.edu)*

*®These authors contributed equally to this work*

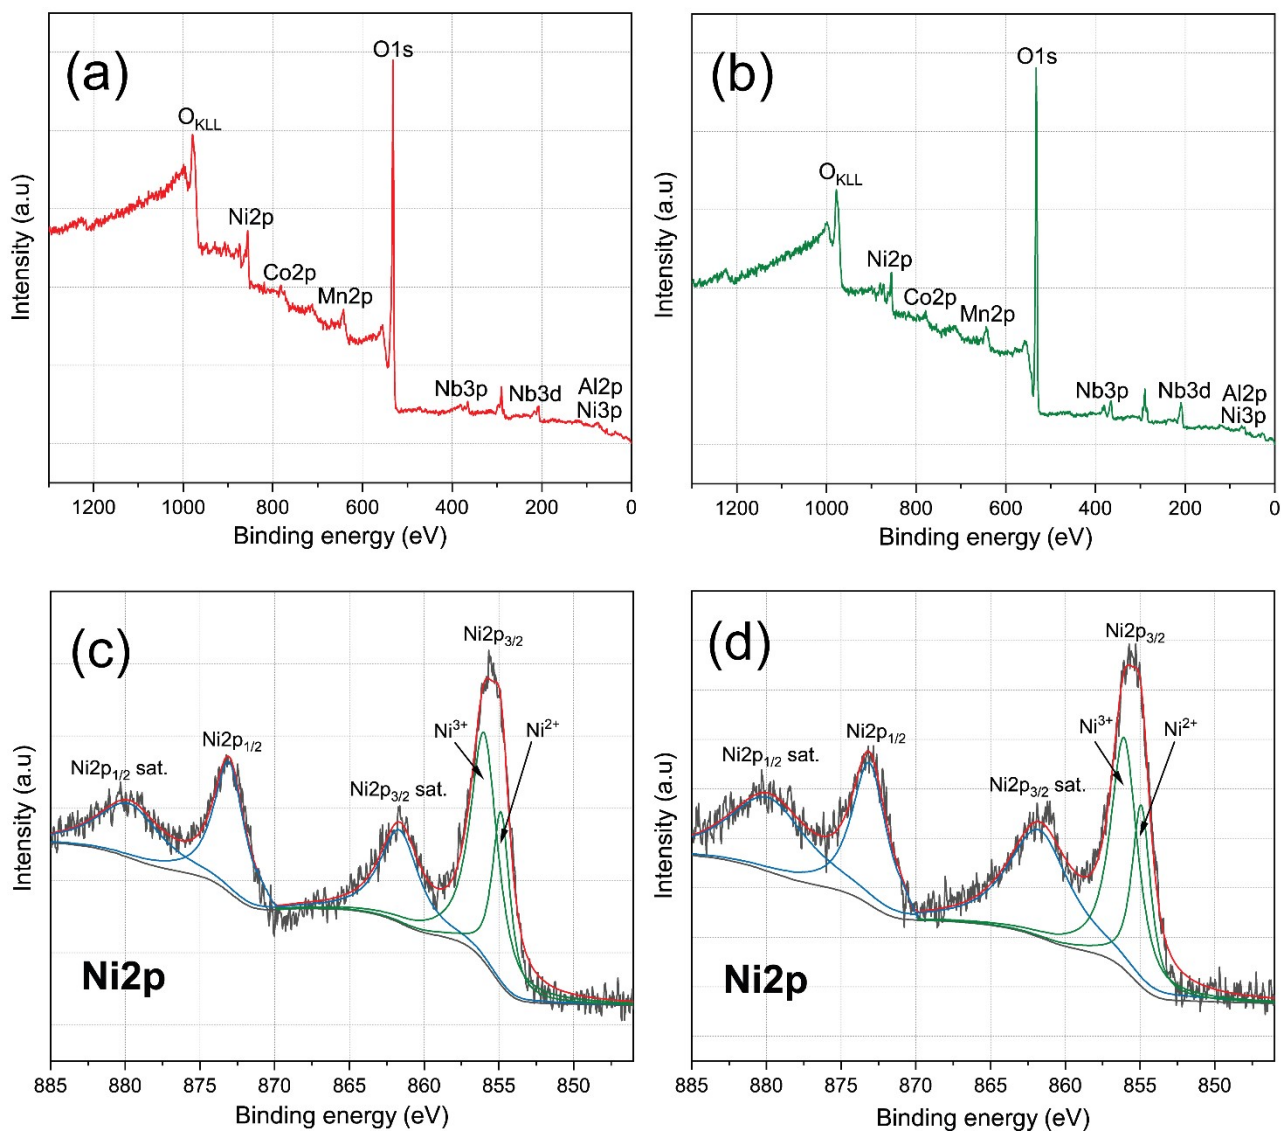

**Figure S1.** (a) Full-scan and (c) Ni2p XPS spectra of NCM-AINb-0.25; (b) full-scan and (d) Ni2p XPS spectra of NCM-AINb-1.

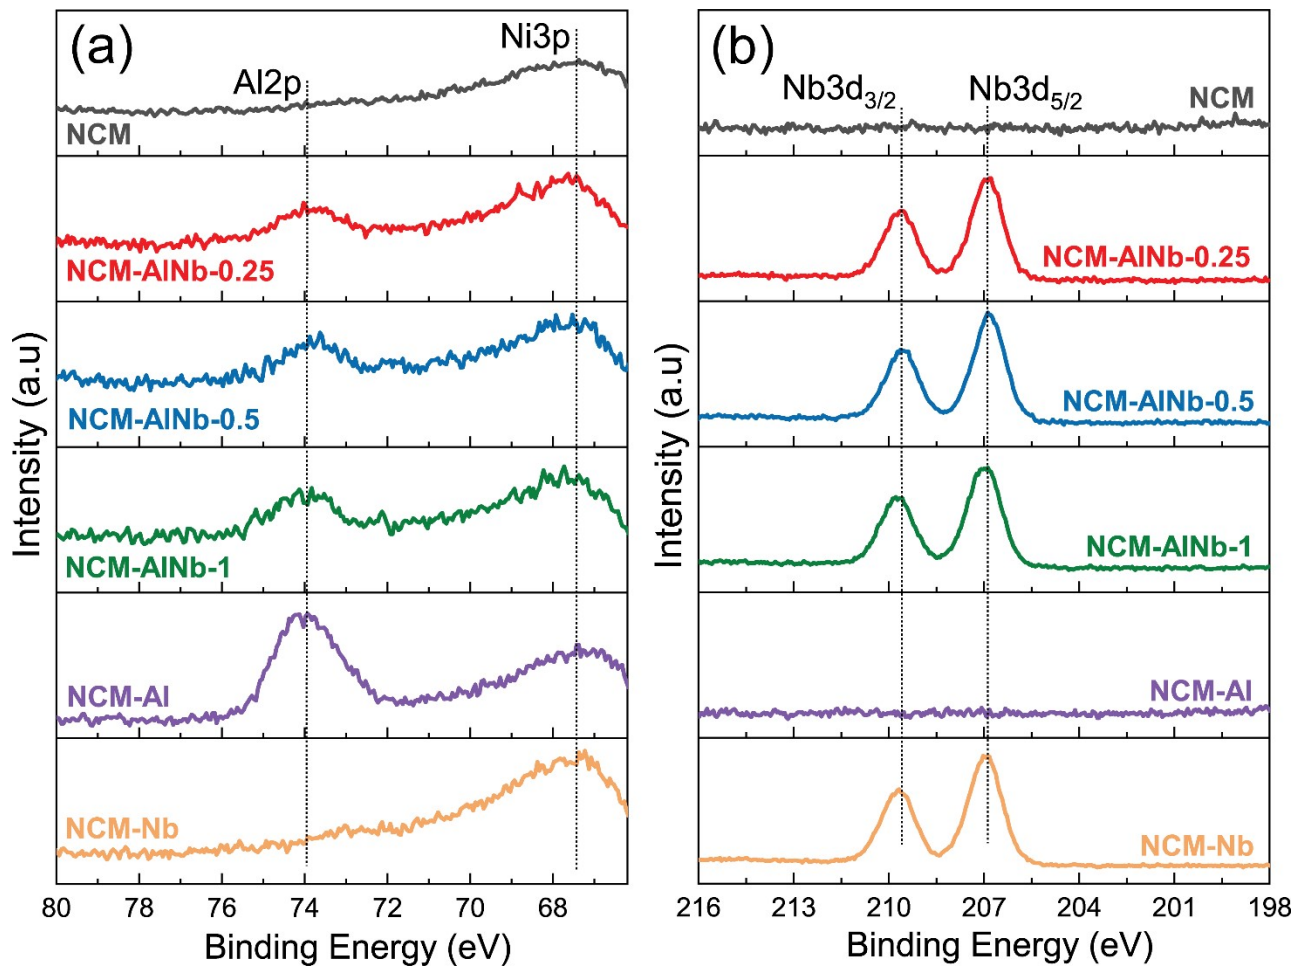

**Figure S2.** (a) Al<sub>2</sub>p XPS spectra and (b) Nb<sub>3</sub>d XPS spectra of uncoated and coated NCMs.

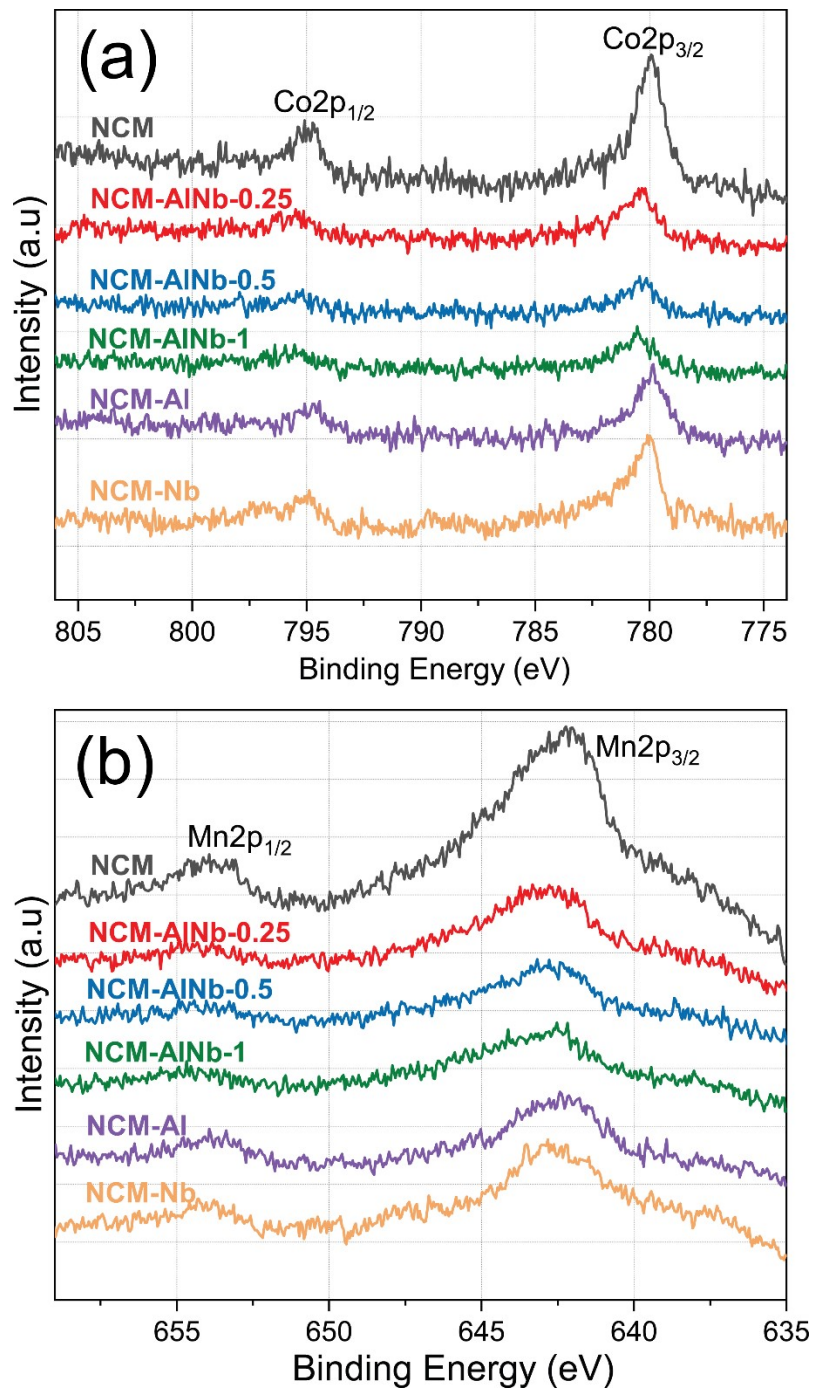

**Figure S3.** (a) Co2p XPS spectra and (b) Mn2p XPS spectra of uncoated and coated NCMs.

(a) NCM-Al

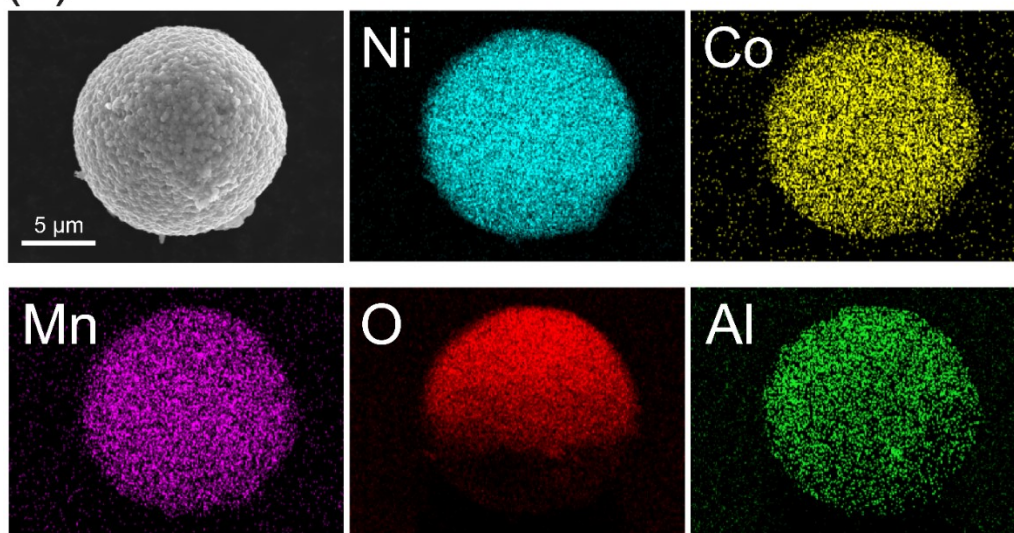

(b) NCM-Nb

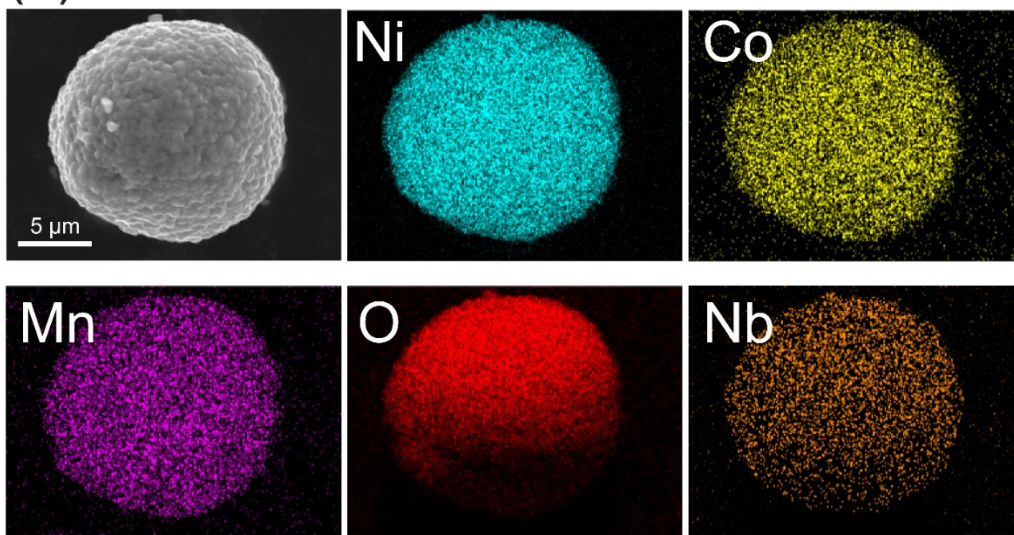

**Figure S4.** SEM images and EDS mapping of (a) NCM-Al, and (b) NCM-Nb.

**Table S1.** Comparison of electrochemical performances of Al<sub>2</sub>O<sub>3</sub>-LiNbO<sub>3</sub> co-coated NCM811 with those in other recently published papers that use either Al or Nb-based materials for coating.

| Active material                                                                                                              | Coating material                                                 | Specific capacity (mAh g <sup>-1</sup> ) | Retention                 | Ref.      |
|------------------------------------------------------------------------------------------------------------------------------|------------------------------------------------------------------|------------------------------------------|---------------------------|-----------|
| LiNi <sub>0.8</sub> Co <sub>0.1</sub> Mn <sub>0.1</sub> O <sub>2</sub>                                                       | Al <sub>2</sub> O <sub>3</sub> -LiNbO <sub>3</sub> (wet process) | 180.85 (0.5C, 2.75-4.3V)                 | 92.08% (0.5C, 100 cycles) | This work |
| LiNi <sub>0.7</sub> Co <sub>0.15</sub> Mn <sub>0.15</sub> O <sub>2</sub>                                                     | Al <sub>2</sub> O <sub>3</sub> (wet process)                     | 160 (0.5C, 3.0-4.3V)                     | ~90% (0.5C, 130 cycles)   | 1         |
| LiCoO <sub>2</sub>                                                                                                           | Al <sub>2</sub> O <sub>3</sub> (wet process)                     | 174 (0.1C, 2.75-4.4V)                    | ~97% (0.5C, 50 cycles)    | 2         |
| Li[Ni <sub>0.8</sub> Co <sub>0.2</sub> ] <sub>0.7</sub> [Ni <sub>0.2</sub> Mn <sub>0.8</sub> ] <sub>0.3</sub> O <sub>2</sub> | Al <sub>2</sub> O <sub>3</sub> (wet process)                     | 197 (0.2C, 2.7-4.5V)                     | 88.83% (0.2C, 100 cycles) | 3         |
| LiNi <sub>0.8</sub> Co <sub>0.15</sub> Al <sub>0.05</sub> O <sub>2</sub>                                                     | Al <sub>2</sub> O <sub>3</sub> (wet process)                     | 171.4 (0.1C, 2.5-4.2V)                   | 83.4% (0.1C, 100 cycles)  | 4         |
| LiNi <sub>0.6</sub> Co <sub>0.2</sub> Mn <sub>0.2</sub> O <sub>2</sub>                                                       | PVA/ Al <sub>2</sub> O <sub>3</sub> (sol-gel)                    | 203.95 (0.5C, 3.0-4.55V)                 | 90% (0.5C, 100 cycles)    | 5         |
| Mg-doped LiNi <sub>0.6</sub> Co <sub>0.2</sub> Mn <sub>0.2</sub> O <sub>2</sub>                                              | LiNbO <sub>3</sub> (wet process)                                 | 155 (1C, 2.8-4.3V)                       | 90.82% (1C, 100 cycles)   | 6         |
| LiNb <sub>0.83</sub> Co <sub>0.11</sub> Mn <sub>0.06</sub> O <sub>2</sub>                                                    | C <sub>4</sub> H <sub>4</sub> NNbO <sub>9</sub>                  | 211.8 (0.2C, 2.7-4.4V)                   | 86.6% (1C, 100 cycles)    | 7         |
| LiNi <sub>0.8</sub> Co <sub>0.1</sub> Mn <sub>0.1</sub> O <sub>2</sub>                                                       | Nb <sub>2</sub> O <sub>5</sub>                                   | 200.2 (0.1C, 3.0-4.3V)                   | 90.6 % (0.1C, 100 cycles) | 8         |
| LiNb <sub>0.83</sub> Co <sub>0.11</sub> Mn <sub>0.06</sub> O <sub>2</sub>                                                    | Nb <sub>2</sub> O <sub>5</sub>                                   | 195 (0.1C)                               | 86.6% (1C, 200 cycles)    | 9         |
| LiNi <sub>0.5</sub> Co <sub>0.2</sub> Mn <sub>0.3</sub> O <sub>2</sub>                                                       | LiNbO <sub>3</sub>                                               | 207.2 (0.2C, 3.0-4.5V)                   | ~83% (1C, 100 cycles)     | 10        |

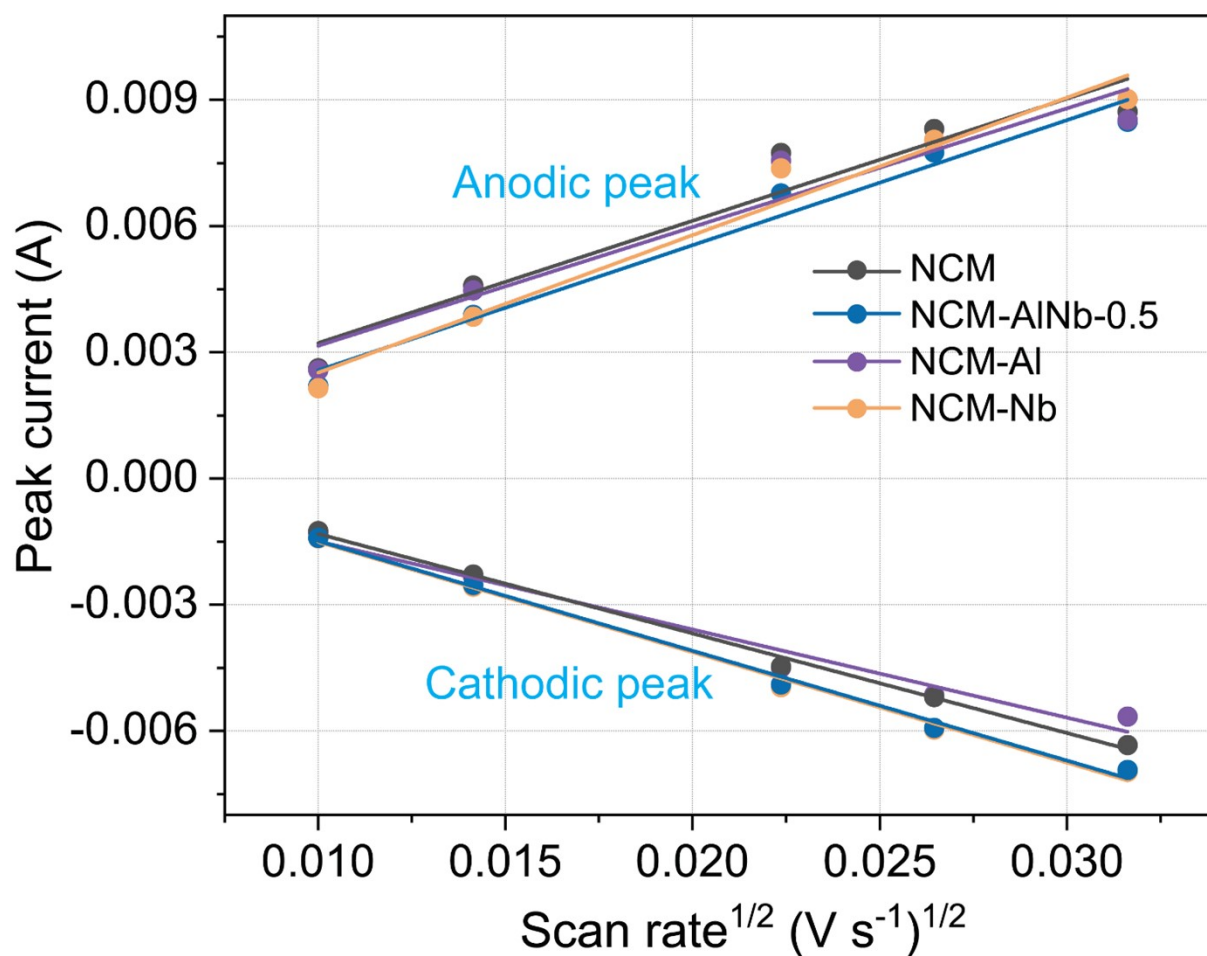

### Anodic peak

| Sample    | NCM             | NCM-AINb-0.5    | NCM-AI         | NCM-Nb          |
|-----------|-----------------|-----------------|----------------|-----------------|
| Intercept | 3.15876E-4      | -4.02915E-4     | 3.33203E-4     | -7.53677E-4     |
| Slope     | 0.29041 ± 0.045 | 0.29733 ± 0.028 | 0.2821 ± 0.043 | 0.32685 ± 0.034 |

### Cathodic peak

| Sample    | NCM             | NCM-AINb-0.5     | NCM-AI           | NCM-Nb           |
|-----------|-----------------|------------------|------------------|------------------|
| Intercept | 0.00105         | 0.00112          | 5.98284E-4       | 0.00111          |
| Slope     | -0.2367 ± 0.008 | -0.26092 ± 0.010 | -0.20949 ± 0.020 | -0.26221 ± 0.011 |

**Figure S5.** Relationship between the peak current ( $I_p$ ) and the square root of the scan rate ( $v^{1/2}$ ).

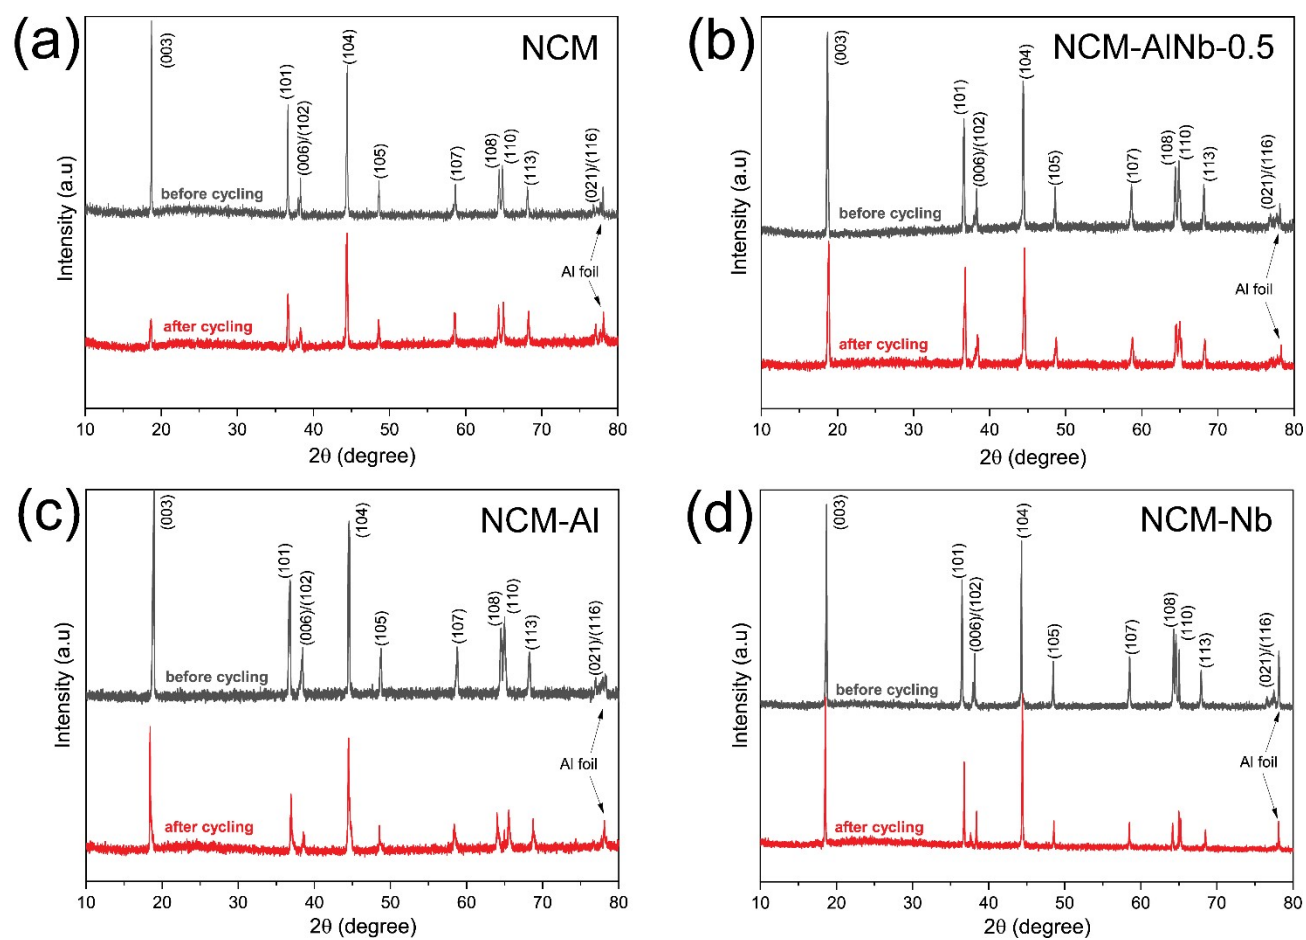

**Figure S6.** XRD spectra of (a) uncoated NCM, (b) NCM-AINb-0.5, (c) NCM-Al and (d) NCM-Nb electrode before and after 100 charge-discharge cycles.



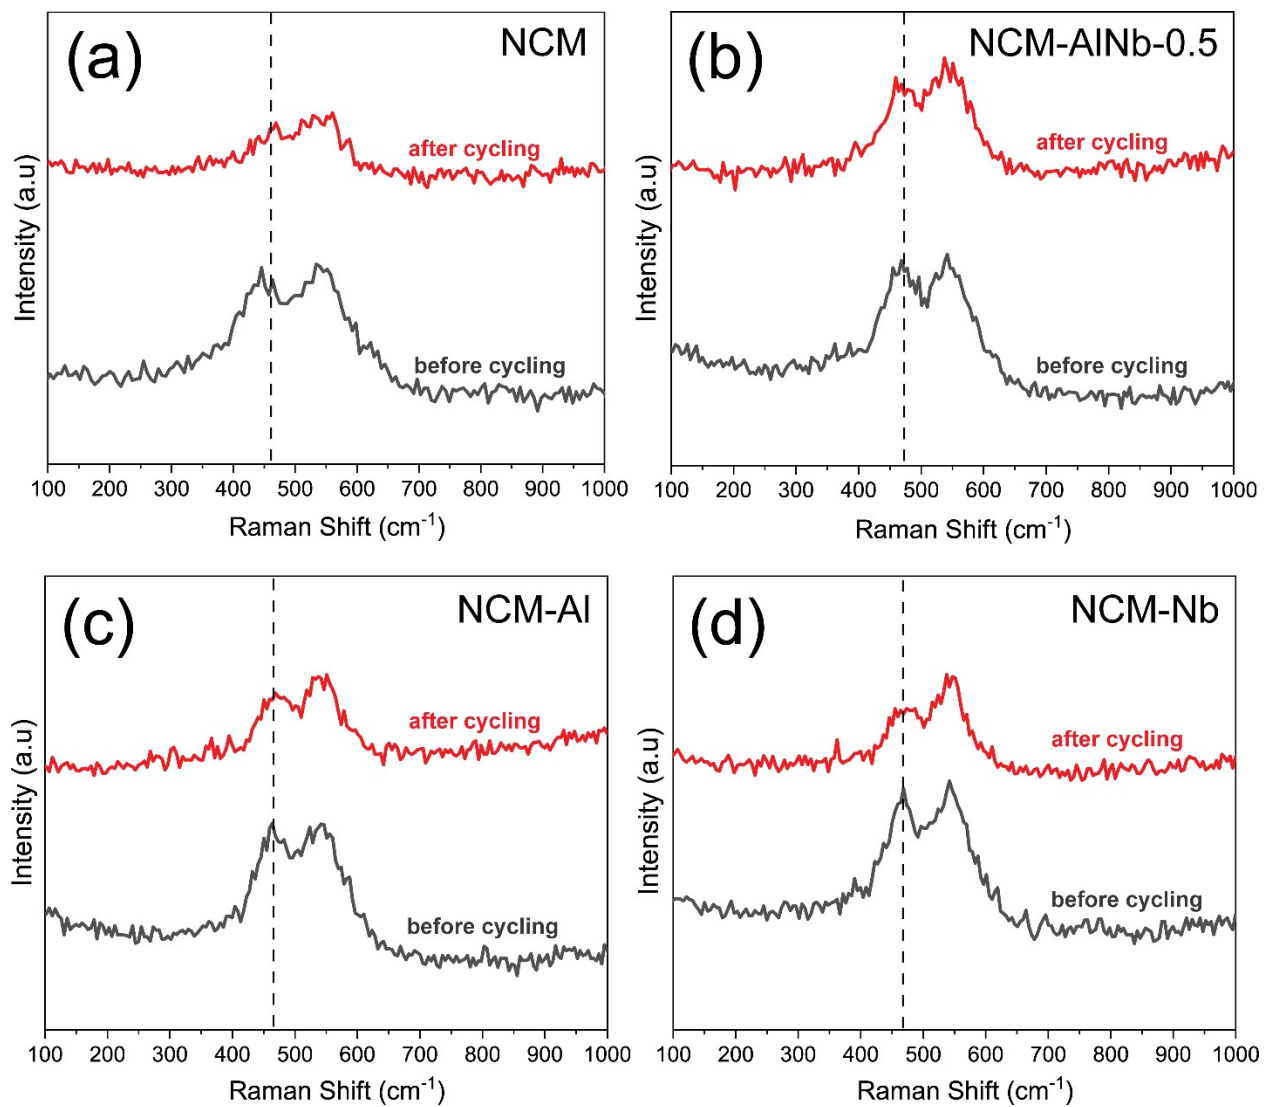

**Figure S7.** Raman spectra of (a) uncoated NCM, (b) NCM-AlNb-0.5, (c) NCM-Al and (d) NCM-Nb electrode before and after 100 charge-discharge cycles.

## References

- 1 R. S. Negi, S. P. Culver, A. Mazilkin, T. Brezesinski and M. T. Elm, *ACS Appl. Mater. Interfaces*, 2020, **12**, 31392–31400.
- 2 J. Cho, Y. J. Kim and B. Park, *Chem. Mater.*, 2000, **12**, 3788–3791.
- 3 J.-Y. Liao and A. Manthiram, *Journal of Power Sources*, 2015, **282**, 429–436.
- 4 S. Hildebrand, C. Vollmer, M. Winter and F. M. Schappacher, *Journal of The Electrochemical Society*, 2017, **164**, A2190.
- 5 Y. Wu, M. Li, W. Wahyudi, G. Sheng, X. Miao, T. D. Anthopoulos, K.-W. Huang, Y. Li and Z. Lai, *ACS Omega*, 2019, **4**, 13972–13980.
- 6 P. Venkatachalam, K. K. Duru, M. Rangarajan, S. Sangaraju, P. S. Maram and S. Kalluri, *Journal of Solid State Electrochemistry*, , DOI:10.1007/s10008-024-05863-0.
- 7 T. Li, X. Chang, Y. Xin, Y. Liu and H. Tian, *J. Phys. Chem. C*, 2023, **127**, 8448–8461.
- 8 Y.-R. Kim, Y.-W. Yoo, D.-Y. Hwang, T.-Y. Shim, C.-Y. Kang, H.-J. Park, H.-S. Kim and S.-H. Lee, *Solid State Ionics*, 2023, **389**, 116108.
- 9 J. Wang, Z. Yi, C. Liu, M. He, C. Miao, J. Li, G. Xu and W. Xiao, *Journal of Colloid and Interface Science*, 2023, **635**, 295–304.
- 10H. Yu, S. Wang, Y. Hu, G. He, L. Q. Bao, I. P. Parkin and H. Jiang, *Green Energy & Environment*, 2022, **7**, 266–274.
